# Supplementary material for: Participation in youth sports influences sarcopenia parameters in older adults
Source: PeerJ journal article supplement (doi:10.7717/peerj.16432), 2023-11-10
Supplement: Vprasalnik_GPAQ.pdf [file Vprasalnik_GPAQ.pdf]

**3. Navedite, kašen je vaš sedanji delovni status (obkrožite):**

|     |                                                                                               |
|-----|-----------------------------------------------------------------------------------------------|
| 1   | Zaposlen (vključeno tudi neplačano delo v družinskem podjetju, status kmeta, gospodinje ipd.) |
| 2   | Zaposlen za krajši delovni čas                                                                |
| 3   | Brezposelna oseba                                                                             |
| 4   | Upokojenec                                                                                    |
| 5   | Upokojenec z občasnim delom                                                                   |
| 3_6 | Drugo (navedite):                                                                             |
| 9   | Ne vem                                                                                        |

**4. Vaše delo (poklic) je potekalo:**

|   |                           |
|---|---------------------------|
| 1 | večinoma sede             |
| 2 | večinoma stoje            |
| 3 | kombinirano stoje in sede |
| 9 | Ne vem                    |

**5. Koliko ljudi vam je tako blizu, da lahko nanje računate, če imate resno osebno težavo?**

|   |           |
|---|-----------|
| 1 | nobeden   |
| 2 | 1 ali 2   |
| 3 | od 3 do 5 |
| 4 | več kot 5 |
| 9 | ne vem    |

**SPLOŠNO ZDRAVSTVENO STANJE**

Zdaj pa bi vas radi povprašali o vašem zdravju oz. splošnem počutju.

**6. Kako bi ocenili svoje ...? (obkroži številko v vsaki vrsti)**

|                                       | zelo dobro | dobro | srednje | slabo | zelo slabo | ne vem |
|---------------------------------------|------------|-------|---------|-------|------------|--------|
| a) Splošno zdravstveno stanje         | 5          | 4     | 3       | 2     | 1          | 9      |
| b) Telesno zmogljivost                | 5          | 4     | 3       | 2     | 1          | 9      |
| c) Psihično počutje                   | 5          | 4     | 3       | 2     | 1          | 9      |
| d) Splošno kakovost svojega življenja | 5          | 4     | 3       | 2     | 1          | 9      |

### 7. Kako po vašem mnenju skrbite za svoje zdravje?

|   |                    |
|---|--------------------|
| 1 | skoraj nič         |
| 2 | bolj malo, premalo |
| 3 | kar dobro          |
| 4 | zelo dobro         |
| 9 | ne vem             |

### 8. Ali imate kakšno dolgotrajno bolezen ali dolgotrajno zdravstveno težavo?

*(za dolgotrajno bolezen ali dolgotrajno zdravstveno težavo se šteje taka bolezen/težava, ki traja ali se pričakuje, da bo trajala 6 mesecev ali več.)*

|   |        |
|---|--------|
| 1 | da     |
| 2 | ne     |
| 9 | ne vem |

**Pred vami je seznam bolezenskih stanj – preberite podrobno in izpolnite ustrezen odgovor za vsako navedeno bolezen (izpolnite vsako vrstico):**

|   | Bolezen/ bolezensko stanje                                         | 9.<br>Ali imate ali ste že imeli katero izmed naslednjih boleznih ali bol. stanj? |    | 10.<br>Če DA, ali je diagnozo te bolezni ugotovil zdravnik |    | 11.<br>Ali ste imeli to bolezen v zadnjih 12 mesecih in ste zato obiskali zdravnika |    |
|---|--------------------------------------------------------------------|-----------------------------------------------------------------------------------|----|------------------------------------------------------------|----|-------------------------------------------------------------------------------------|----|
|   |                                                                    | DA                                                                                | NE | DA                                                         | NE | DA                                                                                  | NE |
| A | Astma (tudi alergijska astma)                                      | 1                                                                                 | 2  | 1                                                          | 2  | 1                                                                                   | 2  |
| B | Kronični bronhitis, kronična obstruktivna pljučna bolezen, emfizem | 1                                                                                 | 2  | 1                                                          | 2  | 1                                                                                   | 2  |
| C | Srčni infarkt (miokardalni infarkt)                                | 1                                                                                 | 2  | 1                                                          | 2  | 1                                                                                   | 2  |
| D | Koronarna srčna bolezen (angina pectoris)                          | 1                                                                                 | 2  | 1                                                          | 2  | 1                                                                                   | 2  |
| E | Zvišan krvni tlak (hipertenzija)                                   | 1                                                                                 | 2  | 1                                                          | 2  | 1                                                                                   | 2  |
| F | Možganska kap (možganska krvavitev, možganska tromboza)            | 1                                                                                 | 2  | 1                                                          | 2  | 1                                                                                   | 2  |
| G | Revmatoidni artritis (vnetje sklepov)                              | 1                                                                                 | 2  | 1                                                          | 2  | 1                                                                                   | 2  |
| H | Osteoartritis (artroza, degenerativne bolezni sklepov)             | 1                                                                                 | 2  | 1                                                          | 2  | 1                                                                                   | 2  |
| I | Bolečina v križu ali druga kronična okvara hrbta                   | 1                                                                                 | 2  | 1                                                          | 2  | 1                                                                                   | 2  |
|   |                                                                    |                                                                                   |    |                                                            |    |                                                                                     |    |

|   | Bolezen/ bolezensko stanje                                                      | Ali imate ali ste že imeli katero izmed naslednjih bolezni ali bol. stanj? |    | Če DA, ali je <u>diagnozo</u> te bolezni ugotovil zdravnik |    | Ali ste imeli to bolezen v zadnjih <u>12 mesecih</u> in ste zato <u>obiskali</u> zdravnika |    |
|---|---------------------------------------------------------------------------------|----------------------------------------------------------------------------|----|------------------------------------------------------------|----|--------------------------------------------------------------------------------------------|----|
|   |                                                                                 | DA                                                                         | NE | DA                                                         | NE | DA                                                                                         | NE |
| J | Bolečina v vratu ali druga kronična okvara vratu                                | 1                                                                          | 2  | 1                                                          | 2  | 1                                                                                          | 2  |
| K | Sladkorna bolezen                                                               | 1                                                                          | 2  | 1                                                          | 2  | 1                                                                                          | 2  |
| L | Alergija (npr. rinitis, očesno vnetje, dermatitis, alergija na hrano ali drugo) | 1                                                                          | 2  | 1                                                          | 2  | 1                                                                                          | 2  |
| M | Razjeda želodca ali dvanajsternika (ulkus)                                      | 1                                                                          | 2  | 1                                                          | 2  | 1                                                                                          | 2  |
| N | Jetrna ciroza, motnje delovanja jeter                                           | 1                                                                          | 2  | 1                                                          | 2  | 1                                                                                          | 2  |
| O | Rak (maligni tumor, levkemija, limfom)                                          | 1                                                                          | 2  | 1                                                          | 2  | 1                                                                                          | 2  |
| P | Močen glavobol, migrena                                                         | 1                                                                          | 2  | 1                                                          | 2  | 1                                                                                          | 2  |
| R | Motnje zadrževanja urina, težave z delovanjem sečnega mehurja                   | 1                                                                          | 2  | 1                                                          | 2  | 1                                                                                          | 2  |
| S | Kronična tesnoba                                                                | 1                                                                          | 2  | 1                                                          | 2  | 1                                                                                          | 2  |
| T | Kronična depresija                                                              | 1                                                                          | 2  | 1                                                          | 2  | 1                                                                                          | 2  |
| J | Druge duševne težave                                                            | 1                                                                          | 2  | 1                                                          | 2  | 1                                                                                          | 2  |
| V | Trajna poškodba ali okvara zaradi posledic nezgode                              | 1                                                                          | 2  | 1                                                          | 2  | 1                                                                                          | 2  |
| Z | Druga dolgotrajna bolezen, navedite katera:<br>_____                            | 1                                                                          | 2  | 1                                                          | 2  | 1                                                                                          | 2  |

**12. Koliko različnih zdravil trenutno uporabljate? (navedite število):** \_\_\_\_\_

**13. Navedite katera zdravila jemljete (navedite vsa, ki jih dobite na recept kot tudi zdravila, ki jih dobite v prosti prodaji):**

---



---



---



---

**14. Ali lahko prehodite 2 km (2000 m) po ravnem brez predaha, uporabe palice ali drugega pripomočka za hojo ali pomoči? (obkrožite številko pred ustreznim odgovorom)**

|   |                         |
|---|-------------------------|
| 1 | Da, brez težav          |
| 2 | Da, z manjšimi težavami |
| 3 | Da, z večjimi težavami  |
| 4 | Sploh ne                |
| 9 | Ne vem                  |

**15. Ali lahko hodite po stopnicah navzdol in navzgor brez predaha, uporabe palice ali drugega pripomočka za hojo ali pomoči oz. uporabe stopniščne ograje ? (obkrožite ustrezno številko)**

|   |                         |
|---|-------------------------|
| 1 | Da, brez težav          |
| 2 | Da, z manjšimi težavami |
| 3 | Da, z večjimi težavami  |
| 4 | Sploh ne, ne morem      |
| 9 | Ne vem                  |

**16. Ali se lahko sklonite in pokleknete brez pripomočkov ali pomoči?**

|   |                         |
|---|-------------------------|
| 1 | Da, brez težav          |
| 2 | Da, z manjšimi težavami |
| 3 | Da, z večjimi težavami  |
| 4 | Sploh ne, ne morem      |
| 9 | Ne vem                  |

**17. Kolikokrat ste v zadnjem letu padli? (padec je opredeljen kot dogodek, ko se oseba nenadoma in neprostoovoljno znajde na tleh ali na drugi, nižji površini)**

|   |              |
|---|--------------|
| 1 | nikoli       |
| 2 | enkrat       |
| 3 | 2-3 krat     |
| 4 | 4-5- krat    |
| 5 | 5 in večkrat |
| 9 | Ne vem       |

**18. Kdaj ste nazadnje padli?** (obkrožite številko pred odgovorom, ki najbolj natančno opredeljuje čas padca)

|   |                        |
|---|------------------------|
| 1 | še nisem padel         |
| 2 | v zadnjem letu         |
| 3 | v zadnjem pol leta     |
| 4 | V zadnjih treh mesecih |
| 5 | v zadnjem mesecu       |
| 6 | v zadnjem tednu        |
| 9 | Ne vem                 |

**19. Kakšen je bil vzrok padca?**

|      |                                 |
|------|---------------------------------|
| 1    | še nisem padel                  |
| 2    | vertoglavica                    |
| 3    | nemoč v nogah (mišična šibkost) |
| 4    | spolzka tla                     |
| 5    | neprimerna obleka, obutev       |
| 4    | stopnice                        |
| 19.7 | drugo: _____                    |
| 9    | Ne vem                          |

**20. Kako najpogosteje preživljate vaš prosti čas?**

|   | PROSTOČASNA AKTIVNOST                                                                                                                                             | vedno | pogosto | občasno | redko | nikoli | ne vem |
|---|-------------------------------------------------------------------------------------------------------------------------------------------------------------------|-------|---------|---------|-------|--------|--------|
| A | v prostem času se ukvarjam z aktivnostmi, za katere ni potrebna telesna aktivnost (npr. berem, gledam televizijo, grem v gledališče, na obisk k prijateljem ipd.) | 5     | 4       | 3       | 2     | 1      | 9      |
| B | v prostem času se ukvarjam z lažjimi telesnimi aktivnostmi (npr. se sprehajam, ukvarjam z lažjim delom na vrtu, z lovom, ribolovom, ipd.)                         | 5     | 4       | 3       | 2     | 1      | 9      |
| C | v prostem času se ukvarjam z aktivnostmi za ohranjanje telesne kondicije (npr. telovadim, tečem, plavam, igram igre z žogo, smučam ipd.)                          | 5     | 4       | 3       | 2     | 1      | 9      |
| D | nikoli nimam prostega časa, ker:                                                                                                                                  | 5     | 4       | 3       | 2     | 1      | 9      |
| E | drugo:                                                                                                                                                            | 5     | 4       | 3       | 2     | 1      | 9      |

## GIBALNE NAVADE

Nadalje vas bomo podrobneje spraševali o vaši **telesni aktivnosti**.

Zanima nas telesna dejavnost (gibalna/športna aktivnost), ki je del vašega vsakdana. Spraševali vas bomo o času, ki ste ga preživeli telesno dejavni v tipičnem dnevu ali tednu. Prosimo vas, če lahko odgovorite na vsako vprašanje, tudi če sami sebe ne vidite kot telesno dejavne. Razmislite o aktivnostih, ki so **del vaših opravil doma, na vrtu, del vaše rekreacije oz. športne vadbe** (npr. nordijska hoja, kolesarjenje, balinanje). **Vprašanja se nanašajo na izvajanje tovrstne aktivnosti, na število dni v tednu, ko jo izvajate in na trajanje v dnevu.**

**Visoko intenzivna telesna dejavnost** se nanaša na aktivnosti, ki zahtevajo **večji telesni napor**, ob katerem se oznojite in ob katerem se pospeši bitje srca in ob katerem dihate precej težje kot normalno (npr. da ste dvigovali težka bremena, kopali v vrtu, hitro tekli, intenzivno kolesarili). Pomislite samo na tako telesno dejavnost, ki ste jo izvajali vsaj **10 minut neprekinjeno**.

**Zmerno intenzivna telesna dejavnost** se nanaša na aktivnosti, ki zahtevajo **zmerni napor**, ob katerem občutite po telesu toploto in dihate nekoliko težje kot normalno (npr. da ste prenašali lažja bremena, kolesarili v zmernem tempu, tekli v zmernem tempu, zmerno telovadili itd...). V to dejavnost ne vključujete hoje. Pomislite samo na tako telesno dejavnost, ki ste jo izvajali **vsaj 10 minut neprekinjeno**.

### Telesna aktivnost pri delu oz. vsakdanjih opravilih

| Aktivnosti pri vsakdanjem delu in opravilih |                                                                                                                                                                                                |                          |
|---------------------------------------------|------------------------------------------------------------------------------------------------------------------------------------------------------------------------------------------------|--------------------------|
| 21.                                         | Ali so vaše delo oz. opravila zahtevala <b>visoko intenzivno telesno dejavnost</b> (npr. da ste <u>dvigovali težka bremena, kopanje ali gradnja</u> itd.), vsaj <b>10 minut neprekinjeno</b> ? | 1 DA                     |
|                                             |                                                                                                                                                                                                | 2 NE                     |
| 22.                                         | <b>Koliko dni v tipičnem tednu</b> ste izvajali <b>visoko intenzivno</b> telesno dejavnost kot del svojega dela?                                                                               | Št. dni : _____ na teden |
| 23.                                         | <b>Koliko časa</b> ste izvajali <b>visoko intenzivno</b> telesno dejavnost v <b>tipičnem dnevu</b> ?                                                                                           | _____ ur, _____ min      |
| 24.                                         | Navedite najdlje trajajočo oz. najpogostejšo <b>visoko intenzivno telesno dejavnost</b> , ki ste jo v tipičnem tednu izvajali (npr. sekanje drv...).                                           |                          |
|                                             |                                                                                                                                                                                                |                          |





### Rekreacijske aktivnosti

V naslednjem sklopu **izvemite delovne aktivnosti in aktivni transport** in se osredotočite na **aktivnosti, ki jih izvajate z namenom rekreacije (gibalne/športne aktivnosti) v prostem času** (sem sodijo tudi organizirana vadba kot tudi individualne telesne aktivnosti)

| Rekreacijske dejavnosti (Gibalno –športne aktivnosti) |                                                                                                                                                                                                                                                                                   |                                              |
|-------------------------------------------------------|-----------------------------------------------------------------------------------------------------------------------------------------------------------------------------------------------------------------------------------------------------------------------------------|----------------------------------------------|
| 33.                                                   | Ali ste izvajali kakšno obliko <b>visoko intenzivne telesne dejavnosti</b> (šport, vadba, rekreacijska aktivnost ( <u>npr. hiter tek, nogomet, tenis, fitnes</u> )), ki povzroči pospešeno bitje srca in ob katerem dihate precej težje, vsaj 10 minut neprekinjeno.              | 1 DA                                         |
|                                                       |                                                                                                                                                                                                                                                                                   | 2 NE                                         |
| 34.                                                   | Koliko dni v tipičnem tednu ste izvajali <b>visoko intenzivno</b> telesno dejavnost kot del svoje rekreacije (gibalno/ športne aktivnosti, npr. hiter tek )?                                                                                                                      | Št. dni : _____ v tednu                      |
| 35.                                                   | Koliko časa ste izvajali visoko intenzivno telesno dejavnost v tipičnem dnevu?                                                                                                                                                                                                    | _____ ur, _____                              |
| 36.                                                   | Navedite najdlje trajajočo oz. najpogostejšo visoko intenzivno telesno dejavnost, ki ste jo z namenom rekreativne gibalne/športne aktivnosti izvajali v tipičnem tednu (npr. tenis..)                                                                                             |                                              |
| Rekreacijske dejavnosti (Gibalno –športne aktivnosti) |                                                                                                                                                                                                                                                                                   |                                              |
| 37.                                                   | Ali ste v tipičnem tednu izvajali kakšno obliko <b>zmerno intenzivne telesne dejavnosti</b> (šport, vadba, rekreacijska aktivnost, ki povzroči <u>rahlo povišan srčni utrip in dihanje</u> (npr. hitra hoja, <u>kolesarjenje, plavanje, odbojka</u> ) vsaj 10 minut neprekinjeno? | 1 DA                                         |
|                                                       |                                                                                                                                                                                                                                                                                   | 2 NE (nadaljujte s sklopom C5, vprašanje 16) |
| 38.                                                   | Koliko dni v tipičnem tednu ste izvajali <b>zmerno intenzivno</b> telesno dejavnost kot rekreativno oz. gibalno/športno dejavnost?                                                                                                                                                | Št. dni : _____ v tednu                      |
| 39.                                                   | Koliko časa ste izvajali <b>zmerno intenzivno</b> telesno dejavnost v tipičnem dnevu?                                                                                                                                                                                             | _____ ur, _____ min                          |
| 40.                                                   | Navedite najdlje trajajočo oz. najpogostejšo <b>zmerno intenzivno telesno</b> dejavnost, ki ste jo z namenom rekreativne gibalne/športne aktivnosti izvajali v tipičnem <u>tednu</u> (npr. hitra <u>hoja</u> ).                                                                   |                                              |

Naslednje vprašanje je namenjeno **navadam sedenja**, ob počitku po delu, doma, ob druženju s prijatelji (vključujoč sedenje za mizo, s prijatelji, gledanju televizije, opravljanje ročnih del, prevozu v avtu, v avtobusu) vendar ne vključuje časa vašega spanja:

| SEDENTARNE NAVADE |                                                                                       |                   |
|-------------------|---------------------------------------------------------------------------------------|-------------------|
| <b>41.</b>        | Koliko časa v <b>običajnem dnevu sedite</b> (vključujoč vse naštete oblike sedenja) ? | _____ur, _____min |
|                   | <b>Koliko največ časa v običajnem dnevu presedite skupaj, brez aktivnih odmorov?</b>  | _____ur, _____min |

**42. V kakšnih oblikah ste gibalno/športno aktivni? (obkrožite številko v vsaki vrsti)**

|   |                         | vedno | pogosto | občasno | redko | nikoli |
|---|-------------------------|-------|---------|---------|-------|--------|
| A | doma – vadim sam        | 5     | 4       | 3       | 2     | 1      |
| B | z družino               | 5     | 4       | 3       | 2     | 1      |
| C | S partnerjem            | 5     | 4       | 3       | 2     | 1      |
| D | s prijatelji            | 5     | 4       | 3       | 2     | 1      |
| E | organizirano v društvu  | 5     | 4       | 3       | 2     | 1      |
| F | drugo (navedite): _____ | 5     | 4       | 3       | 2     | 1      |

**43. Telesno aktiven sem (oz. bi bil) zaradi? (Možnih je več odgovorov, vendar obkrožite največ 3 – tiste, ki imajo za vas največji večji pomen)!**

|   |                                       |
|---|---------------------------------------|
| A | boljše postave                        |
| B | zabave, razvedrila                    |
| C | sprostitve                            |
| D | splošnega zdravja in boljšega počutja |
| E | preventive in zdravljenja bolezni     |
| F | druženja s prijatelji                 |
| G | boljše telesne kondicije              |
| H | Ne vem                                |
| I | drugo<br>(navedite): _____            |

Naslednja vprašanja se bodo nanašala na vašo gibalno aktivnost v preteklosti:

**44.** Ali ste se **v preteklosti rekreativno** ukvarjali s kakšnim športom (npr. pohodništvo, kolesarjenje, smučanje, plavanje)

|   |                                                             |
|---|-------------------------------------------------------------|
| 1 | Ne                                                          |
| 2 | da, bolj redko sem (navedite šport; npr. planinaril): _____ |
| 3 | da, občasno (sezonsko, ob vikendih) sem: _____              |
| 4 | da, pogosto (na tedenski ravni) sem: _____                  |
| 5 | da, še danes (npr. smučam, kolesarim..) _____               |

**45.** Od navedenih športov sem opustil (navedite šport) in **razlog zakaj** ga ne izvajate več (npr. zaradi poškodbe, strahu pred padcem...).

|                                                                |
|----------------------------------------------------------------|
| <b>A1</b> (šport) _____, prenehal/-a zaradi <b>A2</b> _____    |
| <b>B1</b> (šport ) _____, prenehal/-a zaradi: <b>B2</b> _____  |
| <b>C1</b> (šport ) _____, prenehal /-a zaradi: <b>C3</b> _____ |

**46.** Ali ste se kot otrok in mladostnik aktivno ukvarjali s športom, ste bili član športnega društva oz. kluba, ste obiskovali redne treninge)? Obkrožite najustreznejši odgovor.

|      |                                                                    |
|------|--------------------------------------------------------------------|
| 1    | Ne                                                                 |
| 2    | da, v času osnovne šole                                            |
| 3    | da, v času OŠ in srednje šole                                      |
| 4    | da v času OŠ, srednje šole in fakultete ( oz nekje do 30 leta) ... |
| 5    | da, dokler se nisem zaposlil/a                                     |
| 6    | da, dokler si nisem ustvaril/a družine in dobil/a otrok            |
| 7    | da, dokler se nisem poškodoval/a                                   |
| 46_8 | drugo (navedite) _____                                             |
| 9    | neprekinjeno sem aktiven vse do danes...                           |

Če ste obkrožili številko 1 pred odgovorom NE, na 47 vprašanje ne odgovarjajte.

**47.** V katerem športu (navedite največ 2) ste najdlje vztrajali)?

|                                                                   |
|-------------------------------------------------------------------|
| <b>A1</b> šport 1: _____, <b>A2</b> _____ let                     |
| <b>B1</b> šport 2: _____ <b>B2</b> _____ let                      |
| <b>Kakšni so bili vaši največji dosežki v tekmovalnem športu?</b> |
| _____                                                             |
| _____                                                             |
| _____                                                             |
| _____                                                             |

**48. Kdo vas je navdušil za šport?**

|   |                          |
|---|--------------------------|
| 1 | Oče                      |
| 2 | Mati                     |
| 3 | brat/sestra              |
| 4 | sorodnik (navedite):     |
| 5 | Prijatelji /sošolci ____ |
| 6 | drugo (navedite):        |
| 9 | Ne vem                   |

**49. Kdo vam je ob tem nudil vso potrebno podporo (oprema, navijanje, prevoz)?**

---

---

---

---

**50. Kaj menite, kako je ukvarjanje s športom vplivalo na vas?**

---

---

---

Prišli ste do konca!

Hvala za sodelovanje!

**Prosimo, da se držite navodil in izpolnjen vprašalnik pošljete v priloženi kuverti ALI na naslov**

ZRS Koper

Garibaldijeva 1

6000 KOPER

Pripis: POST PANGeA
